# Supplementary material
Source: publisher figshare collection journal article supplement (https://gsajournals.figshare.com/ndownloader/files/13311248)
Supplement: Supplementary file 1 [file 13311248]

## Supplemental Material

**Table S1.** Phenotypic response ( $\Delta\bar{z}$ ) following selection on males, females or both when there is uniparental expression at the locus ( $d = 0$ ,  $i = \pm a$ ). Shown is the phenotypic response ( $\Delta\bar{z}$ ) in offspring (generation  $t$ ) and grand-offspring (generation  $t + 1$ ) following selection on generation  $t - 1$ . The values for the phenotypic response are be in relation to the strength of selection applied (i.e., in each case the value shown will be multiplied by the strength of selection,  $\beta_x$ ).

| Target of selection<br>(generation $t - 1$ ) | Generation                  | Pattern of imprinting               |                                    |
|----------------------------------------------|-----------------------------|-------------------------------------|------------------------------------|
|                                              |                             | Maternal expression<br>( $i = -a$ ) | Paternal expression<br>( $i = a$ ) |
| Females                                      | Offspring ( $t$ )           | $2pqa^2/\bar{w}$                    | 0                                  |
|                                              | Grand-offspring ( $t + 1$ ) | $-pqa^2/\bar{w}$                    | $pqa^2/\bar{w}$                    |
| Males                                        | Offspring ( $t$ )           | 0                                   | $2pqa^2/\bar{w}$                   |
|                                              | Grand-offspring ( $t + 1$ ) | $pqa^2/\bar{w}$                     | $-pqa^2/\bar{w}$                   |
| All                                          | Offspring ( $t$ )           | $2pqa^2/\bar{w}$                    | $2pqa^2/\bar{w}$                   |
|                                              | Grand-offspring ( $t + 1$ ) | 0                                   | 0                                  |
